# Supplementary material for: Effect of bioceramic intracanal medication on the dentinal bond strength of bioceramic cements: an ex-vivo study
Source: PeerJ. 2024 Jul 25;12:e17826. doi: 10.7717/peerj.17826 (PMC11283773; doi:10.7717/peerj.17826)
Supplement: Supplemental Information 1 [file peerj-12-17826-s001.xlsx]

## Sheet: Sheet1
Code	Temp: Intra-canal medicament	0= Ca(OH)2	1= Bi0-C temp	2= no intra canal medicament	Material:	1= Bio-C Repair	0= MTA
No	temp	material	force N	force Mpa	radius	diameter	thickness	pushout
1	0	1	28.53	0.21	1.17355	2.3471	2.04	107.234
2	0	1	3.76	0.3	1.07935	2.1587	2.01	12.807
3	0	1	70.51	0.53	1.19955	2.3991	1.96	260.27
4	0	1	64.35	0.48	1.08335	2.1667	1.97	215.617
5	0	1	22	0.17	1.09765	2.1953	2.02	76.5839
6	0	1	14.34	0.11	0.99195	1.9839	2.01	44.8885
7	0	1	15.25	0.11	1.7104	3.4208	2	81.9025
8	0	1	0.26	0	1.03635	2.0727	1.95	0.824924
9	0	1	33.18	0.25	1.2166	2.4332	1.98	125.484
10	0	1	20.39	0.15	0.99025	1.9805	1.99	63.0834
11	0	1	16.94	0.13	1.70975	3.4195	2.04	92.7632
12	0	1	18.19	0.14	1.24525	2.4905	2	71.1244
13	0	1	19.54	0.15	1.6026	3.2052	2.04	100.295
14	0	1	6.33	0.05	1.33685	2.6737	1.97	26.1729
15	0	1	5.92	0.04	1.02035	2.0407	1.95	18.4929
16	0	1	39.34	0.3	0.9229	1.8458	2.02	115.144
17	0	0	0.42	0	1.30695	2.6139	1.98	1.70637
18	0	0	2.56	0.02	0.99215	1.9843	2	7.9753
19	0	0	59.86	0.45	0.9947	1.9894	1.96	183.225
20	0	0	71.14	0.54	0.95975	1.9195	2.03	217.604
21	0	0	0.23504	0.00177	1.34655	2.6931	1.99	0.988819
22	0	0	1.51488	0.01141	1.06395	2.1279	2.02	5.11152
23	0	0	3.55	0.03	1.14935	2.2987	1.96	12.5556
24	0	0	0.23	0	0.9789	1.9578	2.01	0.710496
25	0	0	3.26	0.02	1.0626	2.1252	1.96	10.6597
26	0	0	2.21	0.02	0.92735	1.8547	2	6.43525
27	0	0	2.54	0.02	1.27505	2.5501	2.01	10.2201
28	0	0	1.94	0.01	1.16295	2.3259	1.99	7.04881
29	0	0	2.13	0.02	1.20605	2.4121	1.98	7.98564
30	0	0	1.08	0.01	1.06255	2.1251	2.02	3.63935
31	0	0	1.53	0.01	1.11605	2.2321	1.95	5.22768
32	0	0	6.59	0.05	1.0499	2.0998	2.04	22.1597
33	2	1	11.1975	0.08436	1.01175	2.0235	1.99	35.3955
34	2	1	3.16205	0.02382	0.98015	1.9603	2.01	9.78041
35	2	1	23.8657	0.1798	1.23155	2.4631	2.02	93.213
36	2	1	11.6926	0.08809	1.05995	2.1199	1.98	38.5266
37	2	1	40.9278	0.30835	1.1244	2.2488	1.99	143.778
38	2	1	3.70587	0.02792	1.0766	2.1532	2.02	12.6531
39	2	1	21.1414	0.15928	1.3937	2.7874	2.03	93.9074
40	2	1	7.05577	0.05316	0.9987	1.9974	1.99	22.0157
41	2	1	17.226	0.12978	1.11305	2.2261	1.95	58.6995
42	2	1	18.6435	0.14046	0.99195	1.9839	2.04	59.2308
43	2	1	39.4381	0.29713	0.90875	1.8175	2.03	114.224
44	2	1	30.3243	0.22846	0.89635	1.7927	2.01	85.7758
45	2	1	18.94	0.14	1.03785	2.0757	2.05	63.2657
46	2	1	43.579	0.32832	0.93655	1.8731	1.95	124.952
47	2	1	7.3501	0.05538	1.47645	2.9529	1.95	33.2236
48	2	1	15.5327	0.11702	0.9728	1.9456	1.96	46.4972
49	2	0	4.12631	0.03109	1.14295	2.2859	2.03	15.0309
50	2	0	0.66841	0.00504	0.93405	1.8681	2.02	1.97999
51	2	0	32.5364	0.24513	1.4019	2.8038	2.04	146.089
52	2	0	2.92627	0.02205	0.9951	1.9902	1.99	9.09775
53	2	0	0.27759	0.00209	1.4573	2.9146	1.98	1.25753
54	2	0	1.24246	0.00936	1.0892	2.1784	1.95	4.14309
55	2	0	2.73331	0.02059	1.4857	2.9714	1.97	12.5599
56	2	0	5.3869	0.04058	0.9136	1.8272	2.01	15.5307
57	2	0	3.48496	0.02626	1.44465	2.8893	2.04	16.1246
58	2	0	16.9271	0.12753	0.98245	1.9649	2	52.2184
59	2	0	14.0782	0.10606	1.3158	2.6316	2.01	58.4565
60	2	0	15.98	0.12	1.2914	2.5828	1.98	64.1508
61	2	0	1.33	0.01	0.9991	1.9982	1.95	4.06813
62	2	0	15.51	0.12	0.9913	1.9826	2.03	49.0019
63	2	0	3.56	0.03	1.0179	2.0358	1.96	11.1509
64	2	0	3.75	0.03	0.94285	1.8857	2.02	11.2131
65	1	1	1.48594	0.01192	1.27065	2.5413	1.98	5.86938
66	1	1	0.87438	0.00701	1.05945	2.1189	2.04	2.96695
67	1	1	1.27024	0.01019	1.21365	2.4273	1.95	4.71969
68	1	1	0.29442	0.00236	1.08045	2.1609	1.96	0.978876
69	1	1	2.32246	0.01863	1.25395	2.5079	1.96	8.96157
70	1	1	0.33603	0.00269	1.19455	2.3891	1.98	1.24781
71	1	1	0.62011	0.00497	1.0088	2.0176	1.99	1.95446
72	1	1	0.90076	0.00722	1.06195	2.1239	1.96	2.94353
73	1	1	1.42008	0.01139	1.0321	2.0642	1.97	4.53315
74	1	1	1.50643	0.01208	1.04255	2.0851	2.02	4.98077
75	1	1	0.50748	0.00407	1.10675	2.2135	2.05	1.80768
76	1	1	2.70253	0.02167	1.0297	2.0594	1.97	8.60691
77	1	1	0.49918	0.004	1.12915	2.2583	2.02	1.78756
78	1	1	1.4206	0.01139	0.9679	1.9358	1.99	4.29591
79	1	1	2.83314	0.02272	1.18375	2.3675	1.97	10.3727
80	1	1	1.5466	0.0124	1.0064	2.0128	1.99	4.86297
81	1	0	0.63441	0.00509	1.02195	2.0439	2.02	2.05613
82	1	0	0.34502	0.00277	0.96375	1.9275	2.04	1.06497
83	1	0	2.8205	0.02262	1.53105	3.0621	2.05	13.8985
84	1	0	0.56803	0.00456	1.2381	2.4762	1.98	2.18621
85	1	0	5.6456	0.04528	1.54655	3.0931	1.96	26.8677
86	1	0	0.46023	0.00369	1.04735	2.0947	2.02	1.52868
87	1	0	0.79222	0.00635	1.12795	2.2559	1.98	2.7778
88	1	0	0.3688	0.00296	0.99835	1.9967	2.03	1.17346
89	1	0	1.37743	0.01105	1.18615	2.3723	1.99	5.1046
90	1	0	2.25709	0.0181	1.0554	2.1108	1.97	7.3677
91	1	0	0.49713	0.00399	1.2596	2.5192	2.01	1.97605
92	1	0	0.41007	0.00329	0.9891	1.9782	2.04	1.29906
93	1	0	0.26325	0.00211	1.18825	2.3765	2.02	0.992036
94	1	0	1.32606	0.01063	0.99925	1.9985	1.99	4.1399
95	1	0	0.31998	0.00257	1.0282	2.0564	1.98	1.02274
96	1	0	0.30711	0.00246	0.9294	1.8588	2.02	0.905206
